# Supplementary material
Source: HighWire-hosted journal article supplement (https://cmaj.ca/highwire/filestream/81736/field_highwire_adjunct_files/3/202392-res-4-at.pdf)
Supplement: 202392-res-4-at.pdf [file 202392-res-4-at.pdf]

#### Supplementary Appendix 4: Detailed Summary of Missing Data

| Variable                                  | Participant did not know or was unsure of answer | Participant refused to answer | Question not asked or data missing | Total        |
|-------------------------------------------|--------------------------------------------------|-------------------------------|------------------------------------|--------------|
| Outcome: History of Myocardial Infarction | 0.3%                                             | 0.0%                          | 0.0%                               | <b>0.3%</b>  |
| Exposure: Cannabis Use                    | 0.2%                                             | 0.4%                          | 17.7%                              | <b>18.3%</b> |
| Sex                                       | 0.1%                                             | 0.1%                          | 0.0%                               | <b>0.1%</b>  |
| Race                                      | 0.0%                                             | 0.0%                          | 0.0%                               | <b>0.0%</b>  |
| Age                                       | 0.0%                                             | 0.0%                          | 0.0%                               | <b>0.0%</b>  |
| BMI                                       | 0.0%                                             | 0.0%                          | 0.0%                               | <b>0.0%</b>  |
| Education Level                           |                                                  | 0.2%*                         |                                    | <b>0.2%</b>  |
| Income Level                              |                                                  | 14.4%*                        |                                    | <b>14.4%</b> |
| Marital Status                            | 0.0%                                             | 0.6%                          | 0.0%                               | <b>0.6%</b>  |
| Smoking Status                            |                                                  | 4.4%*                         |                                    | <b>4.4%</b>  |
| Smokeless Tobacco Use                     | 0.0%                                             | 0.1%                          | 4.1%                               | <b>4.2%</b>  |
| E-Cigarette Status                        | 0.0%                                             | 0.1%                          | 20.5%                              | <b>20.7%</b> |
| Heavy Drinker                             |                                                  | 7.2%*                         |                                    | <b>7.2%</b>  |
| Physical activity                         |                                                  | 3.6%*                         |                                    | <b>3.6%</b>  |
| Healthcare Coverage                       | 0.6%                                             | 0.1%                          | 0.0%                               | <b>0.7%</b>  |
| Kidney Disease                            | 0.2%                                             | 0.0%                          | 0.0%                               | <b>0.2%</b>  |
| Diabetes                                  | 0.2%                                             | 0.0%                          | 0.0%                               | <b>0.2%</b>  |

\*variable obtained from BRFSS-calculated variable, which grouped: 'Participant did not know or was unsure of answer', 'Participant refused to answer', and 'Question not asked or data missing'.
